# Supplementary material
Source: publisher figshare collection journal article supplement (https://acs.figshare.com/ndownloader/files/12463163)
Supplement: Supplementary file 1 [file 12463163]

Supporting Information for:

**ZnGaNO Photocatalyst Particles Prepared from Methane-based Nitridation Using Zn/Ga/CO<sub>3</sub> LDH as Precursor**

Yan-Ling Hu,<sup>1\*</sup> Shuhua Ou,<sup>2</sup> Jialiang Huang,<sup>1</sup> Huayu Ji,<sup>1</sup> Siwan Xiang,<sup>3</sup> Yuqin Zhu,<sup>1</sup> Zhibang Chen,<sup>2</sup> Cheng Gong,<sup>3</sup> Lan Sun,<sup>3</sup> Jiqiong Lian,<sup>1</sup> Dongya Sun,<sup>1</sup> Yongsheng Fu,<sup>4</sup> Tongmei Ma<sup>2\*</sup>

1 Fujian Provincial Key Laboratory of Functional Materials and Applications, School of Materials Science and Engineering, Xiamen University of Technology, Xiamen, 361024, P.R. China

2 School of Chemistry and Chemical Engineering, Guangdong Provincial Key Lab of Green Chemical Product Technology, South China University of Technology, 381 Wushan Road, Tianhe District, Guangzhou 510641, P.R. of China

3 State Key Laboratory of Physical Chemistry of Solid Surfaces, Xiamen University, Xiamen, 361005, P.R. China

4 Key Laboratory for Soft Chemistry and Functional Materials, Nanjing University of Science and Technology, Ministry of Education, Nanjing, 210094, P.R. China

\*Corresponding Authors:

Yan-Ling Hu, huyanling@xmut.edu.cn;

Tongmei Ma, tongmei@scut.edu.cn

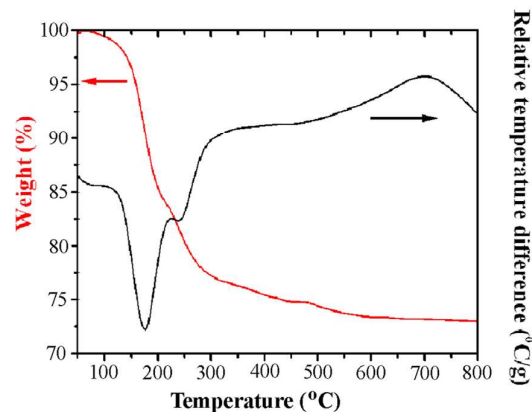

Fig. S1. DTA and TGA curves for the Zn/Ga/CO<sub>3</sub> LDH precursor powder

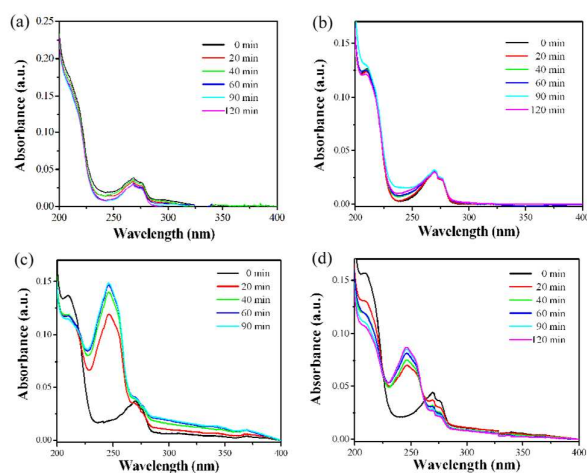

Fig. S2. UV-Vis absorption spectra of phenol solutions upon visible-light irradiation in the presence of (a) S50, (b) S50 loaded with Rh, (c) S50 loaded with 5 wt.% RuO<sub>2</sub>, and (d) S50 loaded with both Rh and 5 wt.% RuO<sub>2</sub>. The absorbance peaks at 210 nm and 271 nm corresponds to phenol, 244 nm to the intermediate BQ, and 276 nm to intermediate catechol.

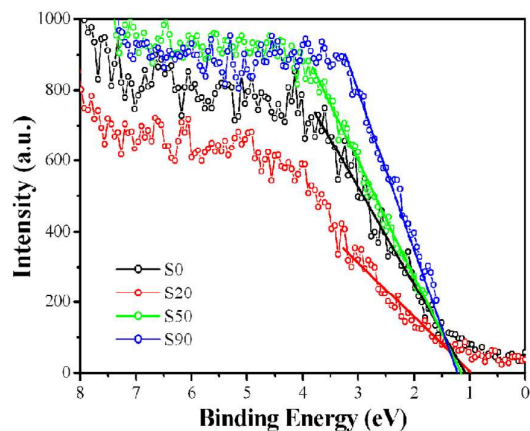

Fig. S3. States of the binding energy using XPS observed for S0, S20, S50, and S90. The spectrum end (point of intersection with the background) corresponds to a valence band maximum ( $E_V$ ), indicating the value of  $E_V$  increasing in the order of S20 < S0 < S50 < S90.

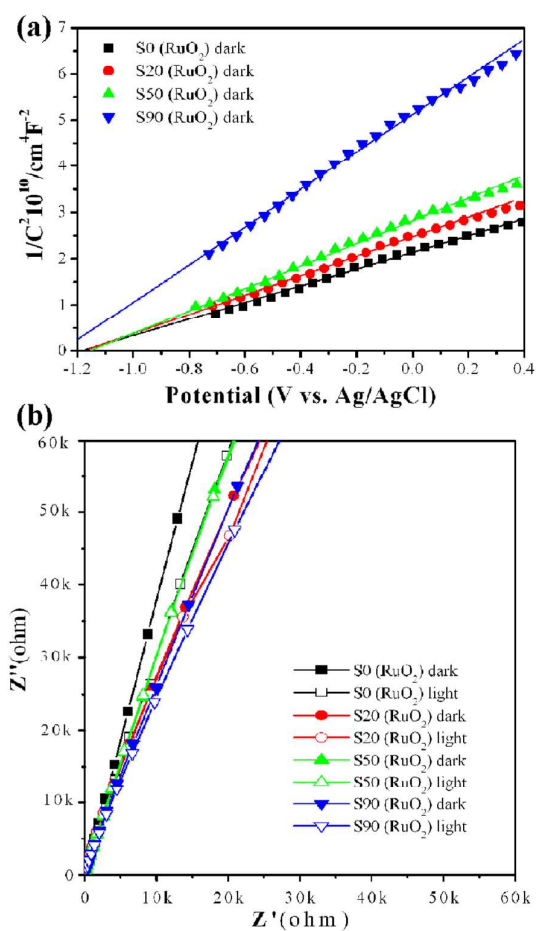

Fig. S4. (a) Mott-Schottky plots and (b) EIS Nyquist plots of FTO electrodes covered with 5 wt.% RuO<sub>2</sub>-loaded S0, S20, S50, and S90.

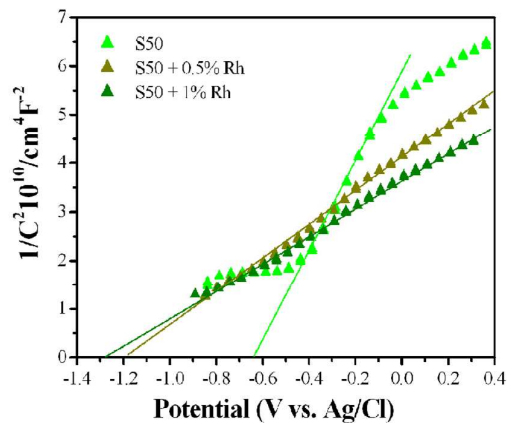

Fig. S5. (a) Mott–Schottky plots of FTO electrodes covered with S50 loaded with different amount of Rh. The particles were prepared by photo-deposition of Rh on S50 particles (0.4 g) which were dispersed in 200 ml aqueous solution containing 20 ml methanol and 0 mg, 15.7 mg, 23.39 mg of  $\text{Na}_3[\text{RhCl}_6] \cdot x\text{H}_2\text{O}$  (Rh 17.1 wt.%), respectively. The obtained powder samples were named as S50, S50+0.5% Rh, and S50+1% Rh, respectively. 0.05 g of the loaded powder was then sonicated in a solution containing 8 ml water, 1.5 ml isopropanol, and 0.5 ml nafion solution (5 wt. %). The suspension was dropped onto a cleaned FTO surface, slowly dried, and repeated several times until a uniform area of  $1.5 \text{ cm}^2$  was achieved.
